# Supplementary material
Source: PubMed Central journal article supplement (PMC6279476)
Supplement: NIHMS981526-supplement-1.pdf [file NIHMS981526-supplement-1.pdf]

## Supplementary Figures

### Supplementary Figure 1: The flow cytometry gating strategy for myeloid populations, validated with

**additional surface markers.** (a) Briefly, AMs were defined as CD11b<sup>+</sup>CD11c<sup>+</sup>Siglec F<sup>+</sup>; > 90% of these AMs also express CD64<sup>+</sup>. Neutrophils were defined as CD11b<sup>+</sup>CD11c<sup>-</sup>Gr-1<sup>hi</sup> cells; neutrophils also express Ly6G, but not Ly6C. Monocytes were defined as CD11b<sup>+</sup>CD11c<sup>-</sup>Gr-1<sup>lo</sup> cells; the majority of them expressed Ly6C and CX3CR1. RMs were defined as CD11b<sup>+</sup>CD11c<sup>-</sup>Gr-1<sup>-</sup>; RMs also expressed CX3CR1, but not CD64 or Ly6C. Red boxes define the criteria used for gating subsets in all figures.

### Supplementary Figure 2: Accumulation of lung innate and adaptive cell populations upon H37Rv or HN878 infection in B6 and CCR2<sup>-/-</sup> mice

(a-e) B6 and CCR2<sup>-/-</sup> mice (n=5) were aerosol-infected with 100 CFU of H37Rv and lung innate immune populations were determined at 30 dpi by flow cytometry. (f-h) B6 and CCR2<sup>-/-</sup> mice were infected with H37Rv or HN878 and accumulation of total CD4<sup>+</sup> T cells and CD44<sup>hi</sup> activated CD4<sup>+</sup> T cells producing IFN- $\gamma$  were determined using flow cytometry. Un.=uninfected, Monos=Monocytes, AMs=Alveolar Macrophages, RMs=Recruited Macrophages, mDCs=Myeloid Dendritic Cells, Neuts=Neutrophils. n=5, (a-h) 1-Way ANOVA with Tukey's post test.

### Supplementary Figure 3: CCL2 deficient mice are susceptible to HN878 infection.

(a) B6 and CCL2<sup>-/-</sup> (n=5) were infected with HN878 and lung bacterial burden was analyzed at 30 dpi. (b) Chemokines protein levels were measured in lung homogenates of HN878 infected IKK2<sup>fl/fl</sup> Sftpc-Cre mice and littermate controls at 21 dpi. (a-b) Student's t-test.

### Supplementary Figure 4: Validation of airway labeling technique using the HCl lung injury model.

B6 mice were treated IT with 50  $\mu$ L of sterile water (vehicle, n=4) or HCl (pH 1.5, n=5) and rested 24 hours

prior to airway CD45.2 labelling and lung harvest. (a) The percentage of total lung cells stained with airway CD45.2 was determined by flow cytometry. (b) Total cell counts for lung myeloid populations were determined by flow cytometry. (c) The percentage of each myeloid cell type positive for airway labelled CD45.2 in vehicle and HCl treated mice is shown. (d) Airway label CD45.2 PE localization was by IHC in PBS treated and HCl treated mice. (e) BAL samples were collected ~10 min after airway labelling with CD45.2 Ab from uninfected and infected mice at 45 dpi. The proportion of AMs stained with airway CD45.2 (left panel, uninfected average= 98.6%, infected =97.5%) as well as the proportion of AMs of the total collected BAL sample (right panel, uninfected average= 48.6%, infected=15.3%). (a-d) Student's t-test was used to compare between groups separately for each myeloid cell type. (e) Student's t-test.

#### **Supplementary Figure 5: Sorting strategy of airway AMs and non-airway AMs.**

Single cell lung suspensions from airway CD45.2 labelled, uninfected (n=4) and infected mice (n=4-5) were prepared and (a) the gating strategy for airway and non-airway AMs is shown. Briefly, CD11c<sup>+</sup>SiglecF<sup>+</sup>CD45.2<sup>+</sup> cells were gated as airway AMs, while CD11c<sup>+</sup>SiglecF<sup>+</sup> CD45.2<sup>-</sup> cells were gated as non-airway AMs. (b) Enrichment of AMs by CD11c magnetic bead sorting for adoptive transfer into mice was carried out using the Miltenyi CD11c+ sorting kit. Expression of SiglecF and CD11c on sorted cells was determined by flow cytometry.

**Supplementary Table 1: Gene expression values of airway and non-airway AM transcriptional signatures from *Mtb*-infected mice.**

RNA sequencing datasets of populations of sorted airway (CD45.2<sup>+</sup> CD11c<sup>+</sup> SiglecF<sup>+</sup>) and non-airway AMs (CD45.2<sup>-</sup> CD11c<sup>+</sup> SiglecF<sup>+</sup>) from infected (n=4-5, 100 CFU HN878, 30 dpi) and uninfected mice (n=4) were analyzed for expression (Log FPKM) of the common AM gene signature (Gautier et al 2012, Misharin et al 2017) (i.e. *Siglecf*, *Pparg*, *Tgfbr2*, *Csf2r*, *Mertk*, *Itgax*, *Lyz2*, *Sftpc*, and *Fcgr1*) and genes associated with monocyte-derived interstitial or recruited macrophages (i.e. *Ly6c1*, *Itgam*, *Cx3cr1*, and *CD163*).

**Supplementary Table 2: Pearson correlation of gene expression levels between sorted airway and non-airway AMs from infected mice.**

RNA sequencing datasets of populations of sorted airway (CD45.2<sup>+</sup> CD11c<sup>+</sup> SiglecF<sup>+</sup>) and non-airway AMs (CD45.2<sup>-</sup> CD11c<sup>+</sup> SiglecF<sup>+</sup>) from infected (n=4-5, 100 CFU HN878, 30 dpi) and uninfected mice (n=4) were compared by Pearson correlation for expression of all genes (a) and the AM signature genes (b).

**Supplementary Table 3: Descriptions of the 116 genes significantly overexpressed in non-airway AMs compared to airway AMs during infection.**

RNA-sequencing of sorted airway AMs (CD45.2<sup>+</sup> CD11c<sup>+</sup> SiglecF<sup>+</sup>) and non-airway AMs (CD45.2<sup>-</sup> CD11c<sup>+</sup> SiglecF<sup>+</sup>) from HN878 infected B6 mice (n=4-5 per group) harvested at 30 dpi. DESeq2 was used to determine significantly overexpressed genes compared to airway samples. FPKM average expression levels and adjusted p values displayed for each.

**Supplementary Table 4: KEGG pathways significantly enriched among the 116 genes overexpressed in non-airway AMs compared to airway AMs during infection.**

Differentially expressed genes overexpressed in non-airway samples were tested for significant enrichment among KEGG pathways using WebGestalt (default settings, adjusted  $P = 0.05$  threshold for enrichment).

**Supplementary Table 5: Descriptions of the 12 genes significantly overexpressed in airway AMs compared to non-airway AMs in HN878-infected mice.**

RNA-sequencing of sorted airway AMs (CD45.2<sup>+</sup> CD11c<sup>+</sup> SiglecF<sup>+</sup>) and non-airway AMs (CD45.2<sup>-</sup> CD11c<sup>+</sup> SiglecF<sup>+</sup>) from HN878 infected B6 mice (n=4-5) at 30 dpi. DESeq2 was used to determine overexpressed genes compared to non-airway samples. FPKM average expression levels and adjusted p values displayed for each.

**Supplementary Table 6: KEGG pathways significantly enriched among the 3517 genes overexpressed in infected airway AMs compared to uninfected airway AMs.**

Differentially expressed genes overexpressed in infected airway samples were tested for significant enrichment among KEGG pathways using WebGestalt (default settings, adjusted  $P = 0.05$  threshold for enrichment).

**Supplementary Table 7: KEGG pathways significantly enriched among the 4442 genes overexpressed in uninfected airway AMs compared to infected airway AMs.**

Differentially expressed genes overexpressed in uninfected airway samples were tested for significant enrichment among KEGG pathways using WebGestalt (default settings, adjusted  $P = 0.05$  threshold for enrichment).



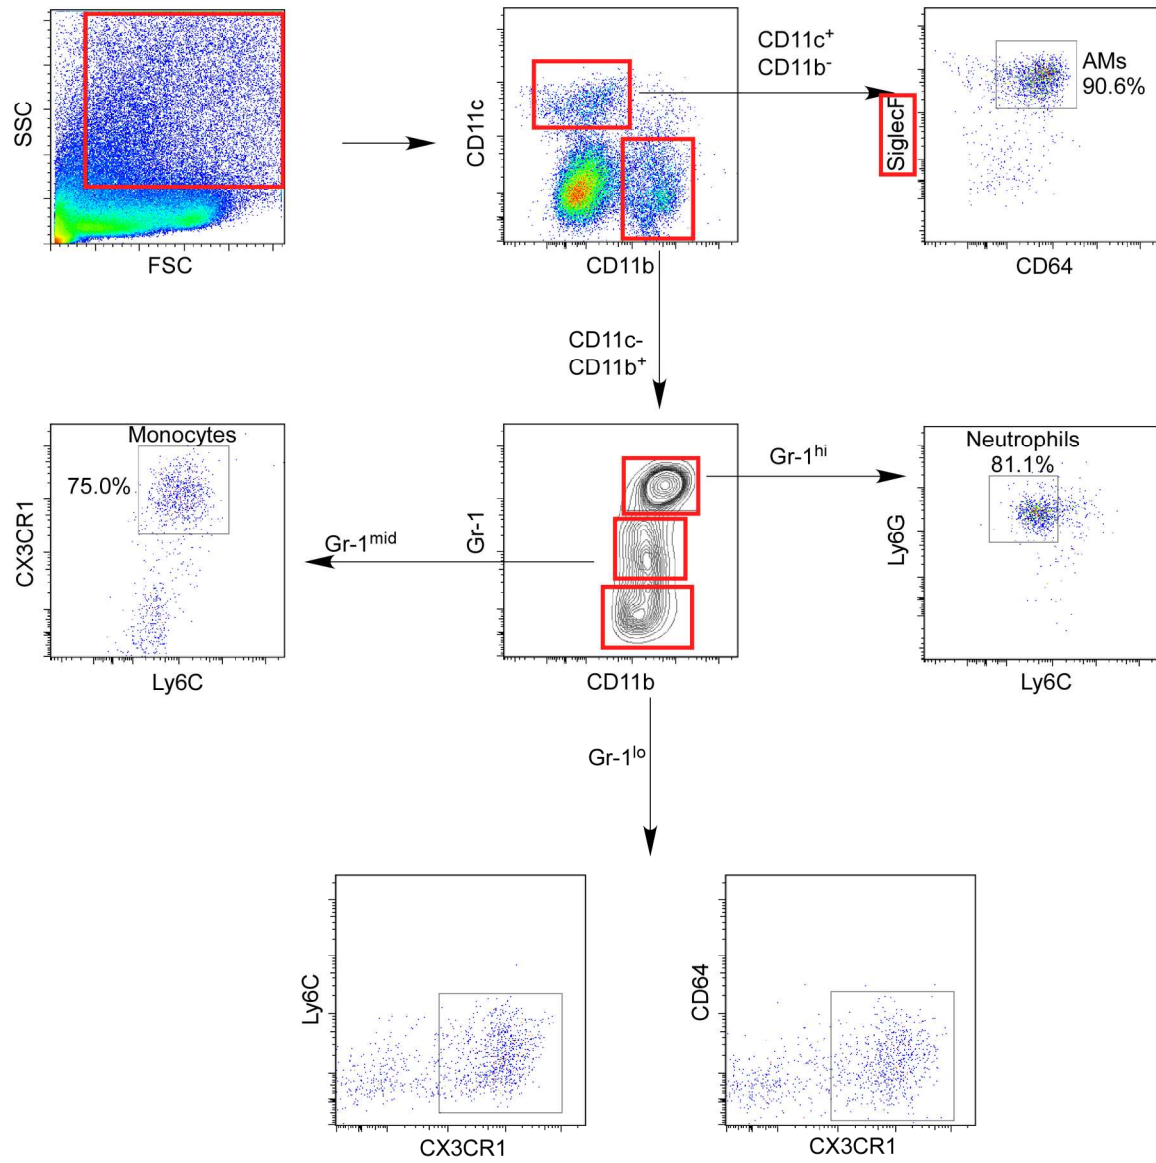

Dunlap et al., Supplementary Figure 1

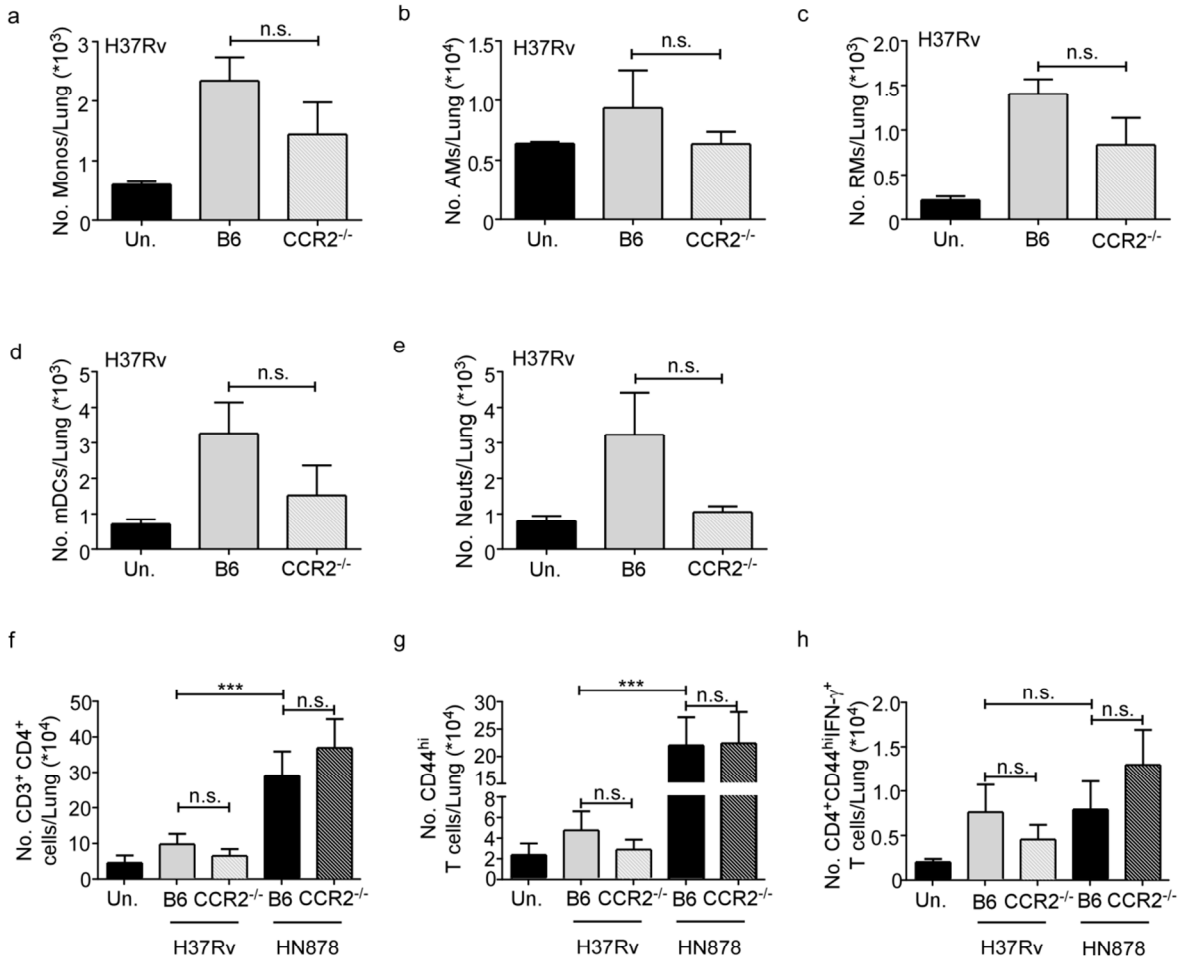

Dunlap et al., Supplementary Figure 2

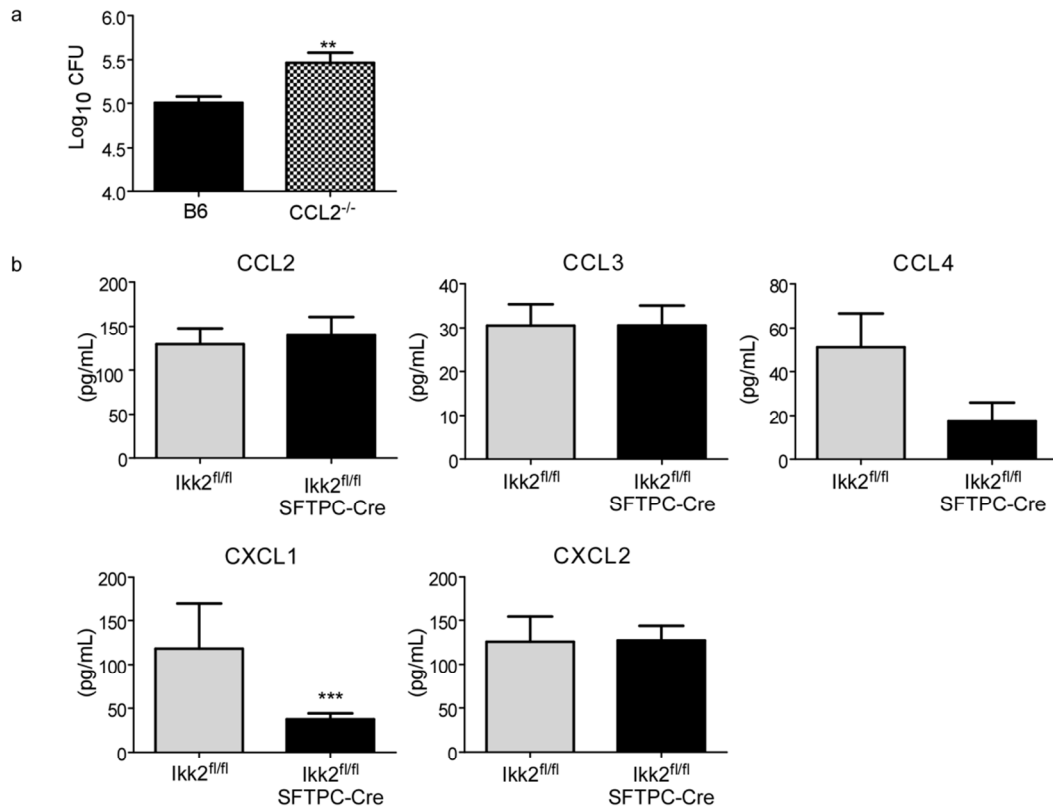

Dunlap et al., Supplementary Figure 3



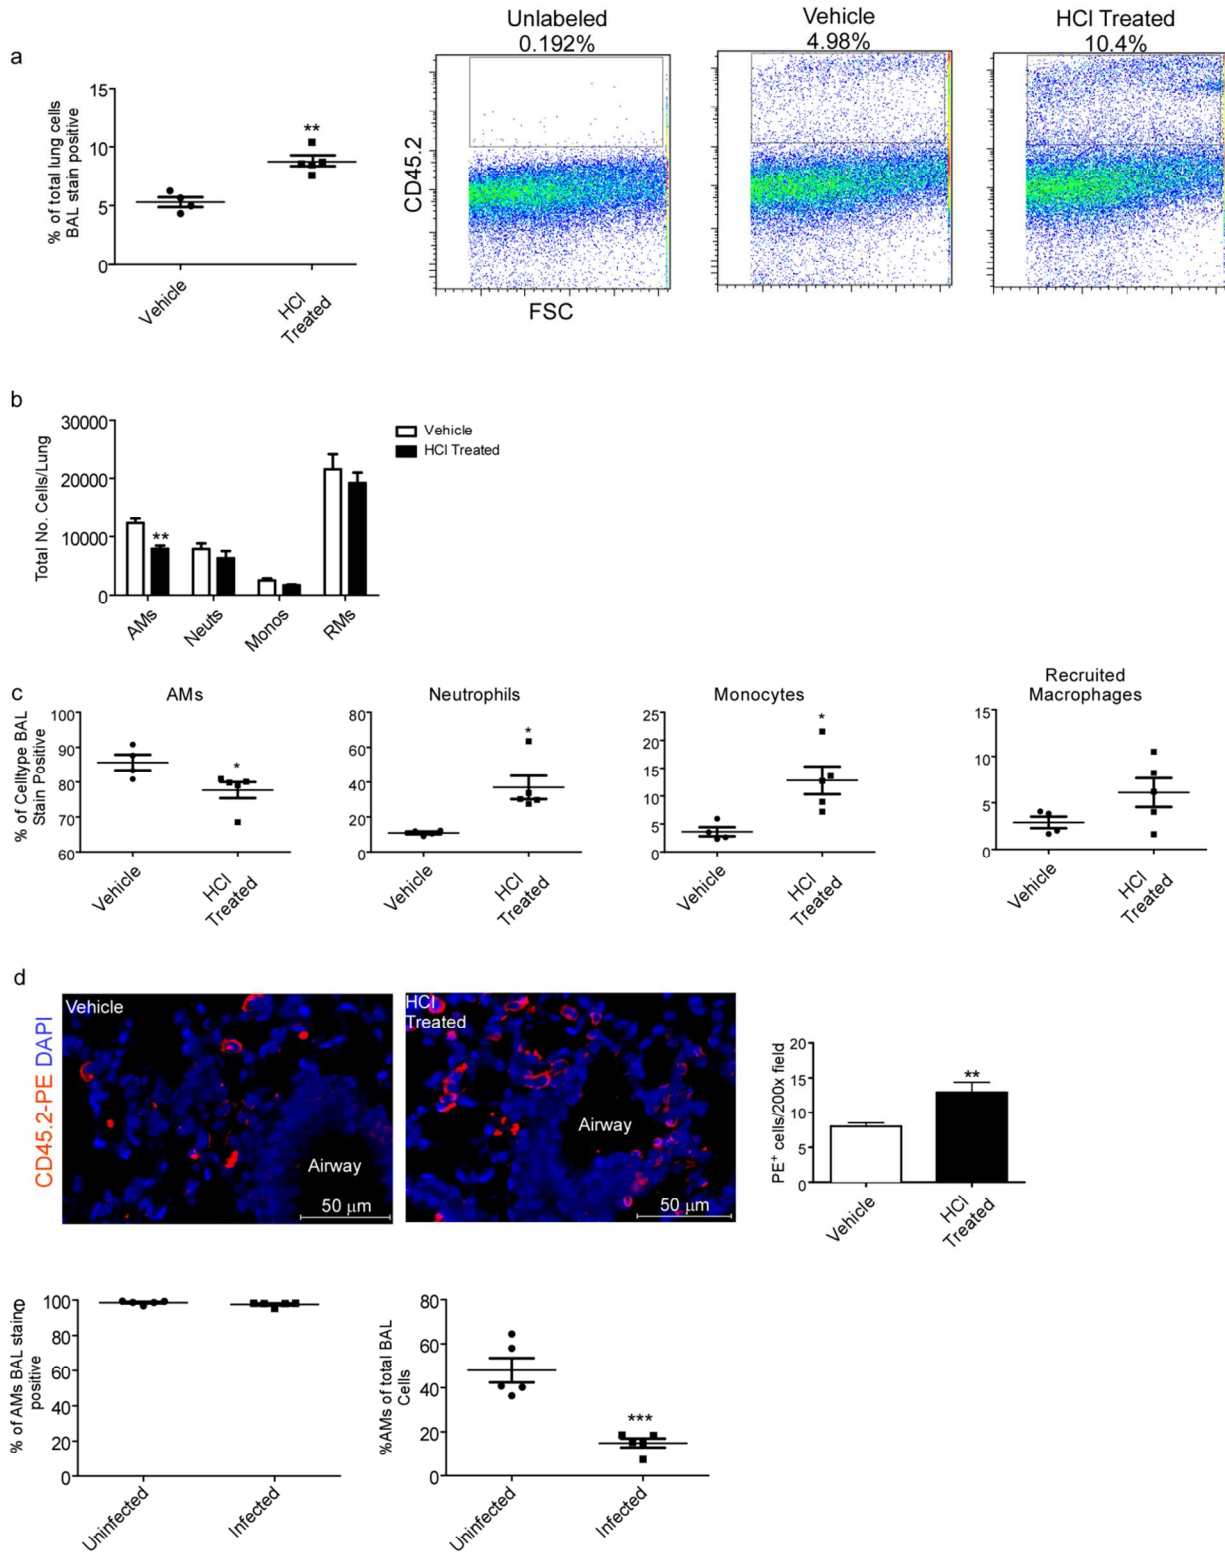

Dunlap et al., Supplementary Figure 4

a

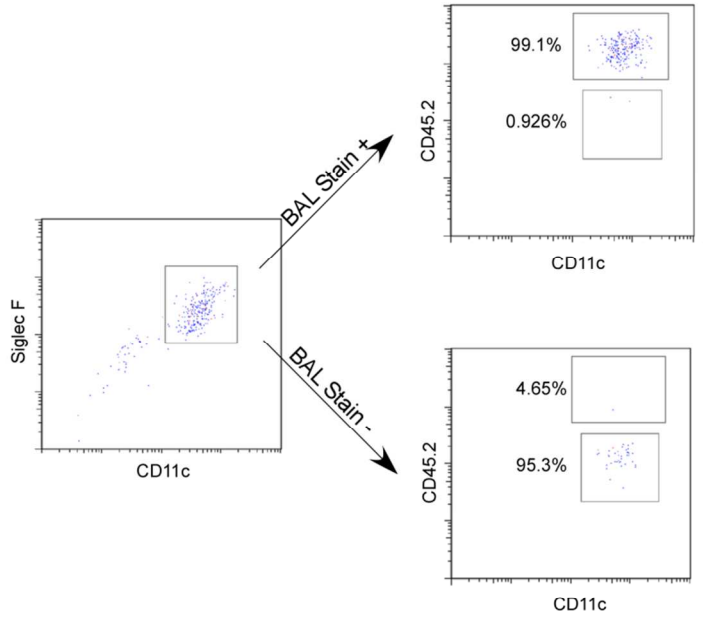

b

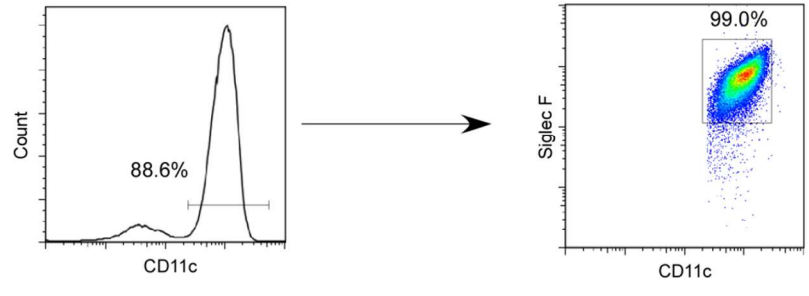

Dunlap et al., Supplementary Figure 5

**Supplementary Table 1:** Gene expression values of airway and non-airway AM transcriptional signatures from *Mtb*-infected mice.

| Gene               |         |                                                  | Infected airway AMs |     |     |     |     | Infected non-airway AMs |     |     |     | Uninfected airway AMs |      |     |     |
|--------------------|---------|--------------------------------------------------|---------------------|-----|-----|-----|-----|-------------------------|-----|-----|-----|-----------------------|------|-----|-----|
| ENSMUSG00000015947 | Fcgr1   | Fc receptor, IgG, high affinity I                | 1.8                 | 1.7 | 1.7 | 1.7 | 1.8 | 1.8                     | 1.8 | 1.8 | 1.9 | 1.5                   | 1.5  | 1.5 | 1.3 |
| ENSMUSG00000032440 | Tgfb2   | transforming growth factor, beta receptor II     | 1.2                 | 1.1 | 1.0 | 1.0 | 1.0 | 1.2                     | 1.0 | 1.0 | 1.0 | 1.5                   | 1.4  | 1.5 | 1.4 |
| ENSMUSG00000014361 | Mertk   | c-mer proto-oncogene tyrosine kinase             | 1.4                 | 1.4 | 1.4 | 1.3 | 1.4 | 1.4                     | 1.4 | 1.4 | 1.2 | 1.8                   | 1.8  | 1.8 | 1.8 |
| ENSMUSG00000000440 | Pparg   | peroxisome proliferator activated receptor gamma | 2.0                 | 1.8 | 1.8 | 1.7 | 1.9 | 1.9                     | 1.8 | 1.8 | 1.8 | 1.9                   | 2.0  | 1.8 | 1.7 |
| ENSMUSG00000030789 | Itgax   | integrin alpha X                                 | 1.7                 | 1.7 | 1.7 | 1.7 | 1.8 | 1.8                     | 1.7 | 1.7 | 1.8 | 2.1                   | 2.1  | 2.1 | 2.0 |
| ENSMUSG00000039013 | Siglecf | sialic acid binding Ig-like lectin F             | 2.1                 | 1.9 | 1.9 | 1.8 | 2.0 | 2.1                     | 2.0 | 1.9 | 2.0 | 2.2                   | 2.3  | 2.2 | 2.1 |
| ENSMUSG00000069516 | Lyz2    | lysozyme 2                                       | 4.8                 | 4.8 | 4.8 | 4.8 | 4.8 | 4.8                     | 4.9 | 4.8 | 4.9 | 4.6                   | 4.7  | 4.5 | 4.3 |
| ENSMUSG00000071714 | Csf2rb2 | colony stimulating factor 2 receptor, beta 2     | 1.0                 | 1.0 | 1.0 | 1.0 | 1.2 | 1.1                     | 1.0 | 1.1 | 1.3 | 1.6                   | 1.4  | 1.6 | 1.5 |
| ENSMUSG00000059326 | Csf2ra  | colony stimulating factor 2 receptor, alpha      | 2.4                 | 2.4 | 2.4 | 2.4 | 2.5 | 2.4                     | 2.4 | 2.3 | 2.4 | 2.4                   | 2.4  | 2.3 | 2.1 |
| ENSMUSG00000008845 | Cd163   | CD163 antigen                                    | 0.0                 | 0.2 | 0.0 | 0.0 | 0.0 | 0.1                     | 0.0 | 0.1 | 0.0 | 0.2                   | 0.3  | 0.3 | 1.9 |
| ENSMUSG00000030786 | Itgam   | integrin alpha M                                 | 0.3                 | 0.4 | 0.4 | 0.6 | 0.3 | 0.6                     | 0.6 | 0.6 | 0.8 | -0.5                  | -0.4 | 0.0 | 0.1 |
| ENSMUSG00000079018 | Ly6c1   | lymphocyte antigen 6 complex, locus C1           | 0.4                 | 0.6 | 0.2 | 0.5 | 0.1 | 0.5                     | 0.2 | 0.6 | 0.5 | 0.6                   | 0.4  | 0.6 | 0.9 |

**Supplementary Table 2a:** Pearson correlation of gene expression levels between sorted airway and non-airway AMs from infected mice, based on the gene expression levels of all genes.

|                                | Infected Airway AMs |        |        |        |        | Infected non-airway AMs |        |        |        | Uninfected Airway AMs |        |        |        |
|--------------------------------|---------------------|--------|--------|--------|--------|-------------------------|--------|--------|--------|-----------------------|--------|--------|--------|
| <b>Infected Airway AMs</b>     |                     | 0.9965 | 0.9960 | 0.9773 | 0.9940 | 0.9976                  | 0.9866 | 0.9923 | 0.9796 | 0.9067                | 0.9465 | 0.8924 | 0.8575 |
|                                | 0.9965              |        | 0.9991 | 0.9801 | 0.9966 | 0.9957                  | 0.9885 | 0.9971 | 0.9856 | 0.9106                | 0.9468 | 0.8996 | 0.8652 |
|                                | 0.9960              | 0.9991 |        | 0.9849 | 0.9974 | 0.9952                  | 0.9875 | 0.9967 | 0.9863 | 0.9124                | 0.9452 | 0.9014 | 0.8669 |
|                                | 0.9773              | 0.9801 | 0.9849 |        | 0.9818 | 0.9833                  | 0.9820 | 0.9841 | 0.9890 | 0.8719                | 0.9108 | 0.8547 | 0.8206 |
|                                | 0.9940              | 0.9966 | 0.9974 | 0.9818 |        | 0.9938                  | 0.9878 | 0.9962 | 0.9863 | 0.9238                | 0.9502 | 0.9125 | 0.8763 |
| <b>Infected non-airway AMs</b> | 0.9976              | 0.9957 | 0.9952 | 0.9833 | 0.9938 |                         | 0.9939 | 0.9958 | 0.9889 | 0.9016                | 0.9447 | 0.8846 | 0.8463 |
|                                | 0.9866              | 0.9885 | 0.9875 | 0.9820 | 0.9878 | 0.9939                  |        | 0.9918 | 0.9923 | 0.9068                | 0.9530 | 0.8866 | 0.8421 |
|                                | 0.9923              | 0.9971 | 0.9967 | 0.9841 | 0.9962 | 0.9958                  | 0.9918 |        | 0.9934 | 0.9044                | 0.9394 | 0.8917 | 0.8534 |
|                                | 0.9796              | 0.9856 | 0.9863 | 0.9890 | 0.9863 | 0.9889                  | 0.9923 | 0.9934 |        | 0.8856                | 0.9249 | 0.8680 | 0.8262 |
| <b>Uninfected Airway AMs</b>   | 0.9067              | 0.9106 | 0.9124 | 0.8719 | 0.9238 | 0.9016                  | 0.9068 | 0.9044 | 0.8856 |                       | 0.9820 | 0.9964 | 0.9596 |
|                                | 0.9465              | 0.9468 | 0.9452 | 0.9108 | 0.9502 | 0.9447                  | 0.9530 | 0.9394 | 0.9249 | 0.9820                |        | 0.9692 | 0.9277 |
|                                | 0.8924              | 0.8996 | 0.9014 | 0.8547 | 0.9125 | 0.8846                  | 0.8866 | 0.8917 | 0.8680 | 0.9964                | 0.9692 |        | 0.9700 |
|                                | 0.8575              | 0.8652 | 0.8669 | 0.8206 | 0.8763 | 0.8463                  | 0.8421 | 0.8534 | 0.8262 | 0.9596                | 0.9277 | 0.9700 |        |

**Supplementary Table 2b:** Pearson correlation of gene expression levels between sorted airway and non-airway AMs from infected mice, based on the gene expression levels of the 12 AM signature genes.

|                                | Infected Airway AMs |           |           |           |           | Infected non-airway AMs |           |           |           | Uninfected Airway AMs |           |           |           |
|--------------------------------|---------------------|-----------|-----------|-----------|-----------|-------------------------|-----------|-----------|-----------|-----------------------|-----------|-----------|-----------|
| <b>Infected Airway AMs</b>     |                     | 0.999987  | 0.999994  | 0.999978  | 0.999984  | 0.999991                | 0.999991  | 0.999989  | 0.999987  | 0.999960              | 0.999914  | 0.999908  | 0.9999474 |
|                                | 0.999987            |           | 0.999997  | 0.999995  | 0.999990  | 0.999998                | 0.999989  | 0.999987  | 0.999987  | 0.9999680             | 0.9999938 | 0.9999148 | 0.9999559 |
|                                | 0.999994            | 0.999997  |           | 0.999988  | 0.999984  | 0.999995                | 0.999997  | 0.999996  | 0.999996  | 0.9999617             | 0.9999915 | 0.9999043 | 0.9999491 |
|                                | 0.999978            | 0.999995  | 0.999988  |           | 0.999996  | 0.999994                | 0.999973  | 0.999971  | 0.999971  | 0.9999717             | 0.9999942 | 0.9999214 | 0.9999594 |
|                                | 0.999984            | 0.999990  | 0.999984  | 0.999996  |           | 0.999994                | 0.999969  | 0.999965  | 0.999965  | 0.9999719             | 0.9999948 | 0.9999210 | 0.9999598 |
| <b>Infected non-airway AMs</b> | 0.999991            | 0.999998  | 0.999995  | 0.999994  | 0.999994  |                         | 0.999986  | 0.999983  | 0.999982  | 0.9999696             | 0.9999949 | 0.9999168 | 0.9999580 |
|                                | 0.999991            | 0.999989  | 0.999997  | 0.999973  | 0.999969  | 0.999986                |           | 1.000000  | 0.999999  | 0.9999564             | 0.9999893 | 0.9998960 | 0.9999435 |
|                                | 0.999989            | 0.999987  | 0.999996  | 0.999971  | 0.999965  | 0.999983                | 1.000000  |           | 1.000000  | 0.9999545             | 0.9999882 | 0.9998931 | 0.9999413 |
|                                | 0.999987            | 0.999987  | 0.999996  | 0.999971  | 0.999965  | 0.999982                | 0.999999  | 1.000000  |           | 0.9999546             | 0.9999880 | 0.9998935 | 0.9999415 |
| <b>Uninfected Airway AMs</b>   | 0.999960            | 0.9999680 | 0.9999617 | 0.9999717 | 0.9999719 | 0.9999696               | 0.9999564 | 0.9999545 | 0.9999546 |                       | 0.9999871 | 0.9999865 | 0.9999974 |
|                                | 0.999914            | 0.9999938 | 0.9999915 | 0.9999942 | 0.9999948 | 0.9999949               | 0.999893  | 0.9999882 | 0.9999880 | 0.9999871             |           | 0.9999473 | 0.9999804 |
|                                | 0.9999008           | 0.9999148 | 0.9999043 | 0.9999214 | 0.9999210 | 0.9999168               | 0.9998960 | 0.9998931 | 0.9998935 | 0.9999865             | 0.9999473 |           | 0.9999881 |
|                                | 0.9999474           | 0.9999559 | 0.9999491 | 0.9999594 | 0.9999598 | 0.9999580               | 0.9999435 | 0.9999413 | 0.9999415 | 0.9999974             | 0.9999804 | 0.9999881 |           |

**Supplementary Table 3.** Descriptions of the 116 genes significantly overexpressed in non-airway AMs compared to airway AMs during *Mtb* infection.

| Gene ID            | Gene short name | Gene Name                                                                           | Average expression level (FPKM) |            | Adjusted P value |
|--------------------|-----------------|-------------------------------------------------------------------------------------|---------------------------------|------------|------------------|
|                    |                 |                                                                                     | Airway                          | Non-airway |                  |
| ENSMUSG00000016283 | H2-M2           | Histocompatibility 2, M region locus 2                                              | 102.7                           | 446.5      | 4.7E-29          |
| ENSMUSG00000035186 | Ubd             | Ubiquitin D                                                                         | 52.1                            | 227.4      | 3.0E-17          |
| ENSMUSG00000030142 | Clec4e          | C-type lectin domain family 4, member e                                             | 42.3                            | 90.8       | 9.2E-16          |
| ENSMUSG00000022126 | Acod1           | Aconitate decarboxylase 1                                                           | 31.6                            | 67.1       | 1.6E-15          |
| ENSMUSG00000031740 | Mmp2            | Matrix metalloproteinase 2                                                          | 4.3                             | 19.2       | 1.6E-15          |
| ENSMUSG00000027962 | Vcam1           | Vascular cell adhesion molecule 1                                                   | 2.3                             | 7.1        | 1.1E-14          |
| ENSMUSG00000038179 | Slamf7          | SLAM family member 7                                                                | 20.0                            | 38.6       | 9.9E-11          |
| ENSMUSG00000027611 | Procr           | Protein C receptor, endothelial                                                     | 21.0                            | 50.6       | 9.4E-09          |
| ENSMUSG00000005089 | Slc1a2          | Solute carrier family 1 (glial high affinity glutamate transporter), member 2       | 0.2                             | 0.7        | 1.2E-08          |
| ENSMUSG00000053318 | Slamf8          | SLAM family member 8                                                                | 41.8                            | 82.3       | 3.9E-08          |
| ENSMUSG00000018217 | Pmp22           | Peripheral myelin protein 22                                                        | 3.8                             | 10.2       | 6.1E-08          |
| ENSMUSG00000020826 | Nos2            | Nitric oxide synthase 2, inducible                                                  | 3.2                             | 11.3       | 6.4E-08          |
| ENSMUSG00000023224 | Serping1        | Serine (or cysteine) peptidase inhibitor, clade G, member 1                         | 4.5                             | 16.7       | 6.4E-08          |
| ENSMUSG00000039395 | Mreg            | Melanoregulin                                                                       | 7.4                             | 13.5       | 7.2E-08          |
| ENSMUSG00000025877 | Hk3             | Hexokinase 3                                                                        | 19.7                            | 32.5       | 7.7E-08          |
| ENSMUSG00000018796 | Acsl1           | Acyl-CoA synthetase long-chain family member 1                                      | 7.6                             | 14.5       | 8.6E-08          |
| ENSMUSG00000029816 | Gpnmb           | Glycoprotein (transmembrane) nmb                                                    | 47.9                            | 75.7       | 1.4E-07          |
| ENSMUSG00000076441 | Ass1            | Argininosuccinate synthetase 1                                                      | 4.4                             | 10.9       | 2.3E-07          |
| ENSMUSG00000056054 | S100a8          | S100 calcium binding protein A8 (calgranulin A)                                     | 156.1                           | 251.7      | 1.0E-06          |
| ENSMUSG00000022303 | Dcstamp         | Dendrocyte expressed seven transmembrane protein                                    | 1.9                             | 5.2        | 1.0E-06          |
| ENSMUSG00000029417 | Cxcl9           | Chemokine (C-X-C motif) ligand 9                                                    | 68.0                            | 144.0      | 1.6E-06          |
| ENSMUSG00000057191 | AB124611        | CDNA sequence AB124611                                                              | 14.9                            | 27.5       | 1.6E-06          |
| ENSMUSG00000038521 | C1s1            | Complement component 1, s subcomponent 1                                            | 12.7                            | 24.3       | 1.0E-05          |
| ENSMUSG00000090231 | Cfb             | Complement factor B                                                                 | 2.7                             | 6.9        | 1.0E-05          |
| ENSMUSG00000024164 | C3              | Complement component 3                                                              | 5.5                             | 13.0       | 1.5E-05          |
| ENSMUSG00000041324 | Inhba           | Inhibin beta-A                                                                      | 40.7                            | 77.5       | 1.5E-05          |
| ENSMUSG00000055546 | Timd4           | T cell immunoglobulin and mucin domain containing 4                                 | 1.7                             | 3.9        | 4.9E-05          |
| ENSMUSG00000026177 | Slc11a1         | Solute carrier family 11 (proton-coupled divalent metal ion transporters), member 1 | 7.4                             | 15.7       | 5.6E-05          |
| ENSMUSG00000031382 | Asb11           | Ankyrin repeat and SOCS box-containing 11                                           | 1.2                             | 2.6        | 5.9E-05          |
| ENSMUSG00000021322 | Aoah            | Acyloxyacyl hydrolase                                                               | 3.0                             | 5.7        | 9.0E-05          |

|                    |          |                                                                                  |       |       |         |
|--------------------|----------|----------------------------------------------------------------------------------|-------|-------|---------|
| ENSMUSG00000030605 | Mfge8    | Milk fat globule-EGF factor 8 protein                                            | 3.5   | 6.6   | 1.6E-04 |
| ENSMUSG00000036636 | Clcn7    | Chloride channel, voltage-sensitive 7                                            | 21.7  | 31.2  | 2.5E-04 |
| ENSMUSG00000046031 | Fam26f   | Family with sequence similarity 26, member F                                     | 138.3 | 218.0 | 2.8E-04 |
| ENSMUSG00000017652 | Cd40     | CD40 antigen                                                                     | 14.7  | 22.5  | 3.0E-04 |
| ENSMUSG00000028517 | Plpp3    | Phospholipid phosphatase 3                                                       | 3.4   | 5.7   | 3.5E-04 |
| ENSMUSG00000032561 | Acpp     | Acid phosphatase, prostate                                                       | 0.1   | 0.3   | 4.0E-04 |
| ENSMUSG00000025854 | Fam20c   | Family with sequence similarity 20, member C                                     | 1.7   | 3.4   | 4.4E-04 |
| ENSMUSG00000028270 | Gbp2     | Guanylate binding protein 2                                                      | 181.2 | 272.2 | 5.8E-04 |
| ENSMUSG00000044162 | Tnip3    | TNFAIP3 interacting protein 3                                                    | 22.0  | 45.6  | 6.3E-04 |
| ENSMUSG00000068129 | Cst7     | Cystatin F (leukocystatin)                                                       | 1.0   | 1.6   | 6.3E-04 |
| ENSMUSG00000024334 | H2-Oa    | Histocompatibility 2, O region alpha locus                                       | 37.0  | 73.1  | 6.5E-04 |
| ENSMUSG00000041827 | Oasl1    | 2'-5' oligoadenylate synthetase-like 1                                           | 5.8   | 8.7   | 6.6E-04 |
| ENSMUSG00000044367 | Slc16a13 | Solute carrier family 16 (monocarboxylic acid transporters), member 13           | 0.4   | 1.0   | 6.7E-04 |
| ENSMUSG00000023913 | Pla2g7   | Phospholipase A2, group VII (platelet-activating factor acetylhydrolase, plasma) | 49.7  | 118.4 | 7.7E-04 |
| ENSMUSG00000050737 | Ptges    | Prostaglandin E synthase                                                         | 2.5   | 3.8   | 8.0E-04 |
| ENSMUSG00000022586 | Ly6i     | Lymphocyte antigen 6 complex, locus I                                            | 425.8 | 777.0 | 8.7E-04 |
| ENSMUSG00000039196 | Orm1     | Orosomuroid 1                                                                    | 4.7   | 13.3  | 8.7E-04 |
| ENSMUSG00000020592 | Sdc1     | Syndecan 1                                                                       | 1.5   | 4.2   | 9.9E-04 |
| ENSMUSG00000070427 | Il18bp   | Interleukin 18 binding protein                                                   | 74.4  | 109.0 | 1.0E-03 |
| ENSMUSG00000026822 | Lcn2     | Lipocalin 2                                                                      | 1.2   | 2.7   | 1.1E-03 |
| ENSMUSG00000020407 | Upp1     | Uridine phosphorylase 1                                                          | 3.3   | 6.2   | 1.2E-03 |
| ENSMUSG00000069515 | Lyz1     | Lysozyme 1                                                                       | 92.5  | 146.1 | 1.2E-03 |
| ENSMUSG00000020010 | Vnn3     | Vanin 3                                                                          | 1.7   | 3.6   | 1.4E-03 |
| ENSMUSG00000025161 | Slc16a3  | Solute carrier family 16 (monocarboxylic acid transporters), member 3            | 5.8   | 8.7   | 1.4E-03 |
| ENSMUSG00000049723 | Mmp12    | Matrix metalloproteinase 12                                                      | 6.2   | 10.0  | 1.7E-03 |
| ENSMUSG00000018920 | Cxcl16   | Chemokine (C-X-C motif) ligand 16                                                | 61.7  | 97.7  | 1.8E-03 |
| ENSMUSG00000037966 | Ninj1    | Ninjurin 1                                                                       | 42.1  | 67.0  | 2.1E-03 |
| ENSMUSG00000036103 | Colec12  | Collectin sub-family member 12                                                   | 3.3   | 5.4   | 2.8E-03 |
| ENSMUSG00000019122 | Ccl9     | Chemokine (C-C motif) ligand 9                                                   | 11.0  | 17.9  | 3.2E-03 |
| ENSMUSG00000036067 | Slc2a6   | Solute carrier family 2 (facilitated glucose transporter), member 6              | 35.5  | 57.3  | 3.2E-03 |
| ENSMUSG00000033192 | Lpcat2   | Lysophosphatidylcholine acyltransferase 2                                        | 37.5  | 62.8  | 4.1E-03 |
| ENSMUSG00000006205 | Htra1    | HtrA serine peptidase 1                                                          | 1.1   | 2.5   | 5.1E-03 |
| ENSMUSG00000031722 | Hp       | Haptoglobin                                                                      | 29.3  | 46.0  | 5.7E-03 |
| ENSMUSG00000054203 | Ifi205   | Interferon activated gene 205                                                    | 12.3  | 18.0  | 7.0E-03 |
| ENSMUSG00000037419 | Endod1   | Endonuclease domain containing 1                                                 | 2.6   | 3.8   | 7.5E-03 |
| ENSMUSG00000055172 | C1ra     | Complement component 1, r subcomponent A                                         | 22.3  | 31.4  | 8.1E-03 |
| ENSMUSG00000030786 | Itgam    | Integrin alpha M                                                                 | 2.6   | 4.5   | 9.6E-03 |

|                    |            |                                                                                                              |        |        |         |
|--------------------|------------|--------------------------------------------------------------------------------------------------------------|--------|--------|---------|
| ENSMUSG00000039699 | Batf2      | Basic leucine zipper transcription factor, ATF-like 2                                                        | 13.3   | 18.9   | 1.0E-02 |
| ENSMUSG00000011752 | Pgam1      | Phosphoglycerate mutase 1                                                                                    | 23.1   | 30.2   | 1.0E-02 |
| ENSMUSG00000024899 | Papss2     | 3'-phosphoadenosine 5'-phosphosulfate synthase 2                                                             | 0.9    | 2.0    | 1.1E-02 |
| ENSMUSG00000024187 | Fam234a    | Family with sequence similarity 234, member A                                                                | 3.4    | 4.8    | 1.1E-02 |
| ENSMUSG00000030760 | Acer3      | Alkaline ceramidase 3                                                                                        | 7.9    | 11.0   | 1.1E-02 |
| ENSMUSG00000024084 | Qpct       | Glutamyl-peptide cyclotransferase (glutamyl cyclase)                                                         | 16.6   | 22.5   | 1.4E-02 |
| ENSMUSG00000039062 | Anpep      | Alanyl (membrane) aminopeptidase                                                                             | 1.1    | 1.9    | 1.4E-02 |
| ENSMUSG00000000957 | Mmp14      | Matrix metalloproteinase 14 (membrane-inserted)                                                              | 16.4   | 23.8   | 1.4E-02 |
| ENSMUSG00000030144 | Clec4d     | C-type lectin domain family 4, member d                                                                      | 21.9   | 30.7   | 1.4E-02 |
| ENSMUSG00000028327 | Stra6l     | STRA6-like                                                                                                   | 0.7    | 1.0    | 1.8E-02 |
| ENSMUSG00000020077 | Srgn       | Serglycin                                                                                                    | 208.0  | 287.7  | 1.8E-02 |
| ENSMUSG00000027555 | Car13      | Carbonic anhydrase 13                                                                                        | 133.4  | 167.6  | 1.8E-02 |
| ENSMUSG00000033880 | Lgals3bp   | Lectin, galactoside-binding, soluble, 3 binding protein                                                      | 2.6    | 4.3    | 1.8E-02 |
| ENSMUSG00000028645 | Slc2a1     | Solute carrier family 2 (facilitated glucose transporter), member 1                                          | 9.5    | 13.1   | 1.8E-02 |
| ENSMUSG00000027737 | Slc7a11    | Solute carrier family 7 (cationic amino acid transporter, y+ system), member 11                              | 1.7    | 3.0    | 1.9E-02 |
| ENSMUSG00000079442 | St6galnac4 | ST6 (alpha-N-acetylneuraminyl-2,3-beta-galactosyl-1,3)-N-acetylgalactosaminide alpha-2,6-sialyltransferase 4 | 4.7    | 6.4    | 2.2E-02 |
| ENSMUSG00000009585 | Apobec3    | Apolipoprotein B mRNA editing enzyme, catalytic polypeptide 3                                                | 8.9    | 11.3   | 2.2E-02 |
| ENSMUSG00000037820 | Tgm2       | Transglutaminase 2, C polypeptide                                                                            | 58.3   | 74.0   | 2.2E-02 |
| ENSMUSG00000020057 | Dram1      | DNA-damage regulated autophagy modulator 1                                                                   | 44.8   | 58.0   | 2.3E-02 |
| ENSMUSG00000037405 | Icam1      | Intercellular adhesion molecule 1                                                                            | 62.1   | 86.1   | 2.4E-02 |
| ENSMUSG00000079057 | Cyp4v3     | Cytochrome P450, family 4, subfamily v, polypeptide 3                                                        | 23.5   | 29.2   | 2.4E-02 |
| ENSMUSG00000025791 | Pgm2       | Phosphoglucomutase 2                                                                                         | 10.3   | 12.8   | 2.6E-02 |
| ENSMUSG00000062300 | Nectin2    | Nectin cell adhesion molecule 2                                                                              | 1.5    | 2.3    | 2.6E-02 |
| ENSMUSG00000015340 | Cybb       | Cytochrome b-245, beta polypeptide                                                                           | 9.9    | 16.2   | 2.7E-02 |
| ENSMUSG00000032294 | Pkm        | Pyruvate kinase, muscle                                                                                      | 115.1  | 141.3  | 2.7E-02 |
| ENSMUSG00000045827 | Serpinb9   | Serine (or cysteine) peptidase inhibitor, clade B, member 9                                                  | 286.8  | 336.2  | 2.7E-02 |
| ENSMUSG00000023947 | Nfkbie     | Nuclear factor of kappa light polypeptide gene enhancer in B cells inhibitor, epsilon                        | 13.2   | 16.8   | 2.9E-02 |
| ENSMUSG00000007891 | Ctsd       | Cathepsin D                                                                                                  | 2006.3 | 2618.4 | 2.9E-02 |
| ENSMUSG00000026866 | Kynu       | Kynureninase (L-kynurenine hydrolase)                                                                        | 13.6   | 16.7   | 2.9E-02 |
| ENSMUSG00000028965 | Tnfrsf9    | Tumor necrosis factor receptor superfamily, member 9                                                         | 2.6    | 6.2    | 2.9E-02 |
| ENSMUSG00000046879 | Irgm1      | Immunity-related GTPase family M member 1                                                                    | 50.1   | 65.5   | 3.1E-02 |
| ENSMUSG00000031438 | Rnf128     | Ring finger protein 128                                                                                      | 6.2    | 8.8    | 3.4E-02 |
| ENSMUSG00000041515 | Irf8       | Interferon regulatory factor 8                                                                               | 42.6   | 52.4   | 3.7E-02 |
| ENSMUSG00000047414 | Flrt2      | Fibronectin leucine rich transmembrane protein 2                                                             | 0.0    | 0.1    | 3.7E-02 |
| ENSMUSG00000004952 | Rasa4      | RAS p21 protein activator 4                                                                                  | 3.5    | 4.7    | 3.8E-02 |
| ENSMUSG00000002103 | Acp2       | Acid phosphatase 2, lysosomal                                                                                | 16.8   | 19.6   | 3.9E-02 |

|                    |          |                                                                                                                  |      |      |         |
|--------------------|----------|------------------------------------------------------------------------------------------------------------------|------|------|---------|
| ENSMUSG00000044309 | Apol7c   | Apolipoprotein L 7c                                                                                              | 1.3  | 2.6  | 4.0E-02 |
| ENSMUSG00000032802 | Srxn1    | Sulfiredoxin 1 homolog (S. cerevisiae)                                                                           | 11.7 | 15.0 | 4.2E-02 |
| ENSMUSG00000026879 | Gsn      | Gelsolin                                                                                                         | 14.4 | 18.3 | 4.2E-02 |
| ENSMUSG00000094724 | Rnaset2b | Ribonuclease T2B                                                                                                 | 49.2 | 63.4 | 4.2E-02 |
| ENSMUSG00000024770 | Lipn     | Lipase, family member N                                                                                          | 0.7  | 1.5  | 4.3E-02 |
| ENSMUSG00000024621 | Csf1r    | Colony stimulating factor 1 receptor                                                                             | 48.3 | 60.7 | 4.3E-02 |
| ENSMUSG00000023991 | Foxp4    | Forkhead box P4                                                                                                  | 0.3  | 0.6  | 4.4E-02 |
| ENSMUSG00000031266 | Gla      | Galactosidase, alpha                                                                                             | 20.9 | 25.3 | 4.4E-02 |
| ENSMUSG00000036086 | Zranb3   | Zinc finger, RAN-binding domain containing 3                                                                     | 1.0  | 1.4  | 4.7E-02 |
| ENSMUSG00000029860 | Zyx      | Zyxin                                                                                                            | 32.3 | 43.9 | 4.7E-02 |
| ENSMUSG00000021451 | Sema4d   | Sema domain, immunoglobulin domain (Ig), transmembrane domain (TM) and short cytoplasmic domain, (semaphorin) 4D | 3.4  | 5.9  | 4.8E-02 |
| ENSMUSG00000064358 | mt-Co3   | Mitochondrially encoded cytochrome c oxidase III                                                                 | 0.7  | 8.9  | 4.8E-02 |
| ENSMUSG00000053030 | Spink2   | Serine peptidase inhibitor, Kazal type 2                                                                         | 22.3 | 37.3 | 5.0E-02 |



**Supplementary Table 4:** KEGG pathways significantly enriched among the 116 genes overexpressed in non-airway AMs compared to airway AMs during infection.

| KEGG ID  |                                     | # genes<br>in<br>pathway | #<br>genes<br>in test<br>set | Expected<br># genes | Enrichment<br>Ratio | Adjusted<br>P value |
|----------|-------------------------------------|--------------------------|------------------------------|---------------------|---------------------|---------------------|
| mmu05150 | Staphylococcus aureus infection     | 52                       | 7                            | 0.42                | 16.63               | 4.9E-05             |
| mmu05133 | Pertussis                           | 75                       | 7                            | 0.61                | 11.53               | 3.2E-04             |
| mmu04610 | Complement and coagulation cascades | 87                       | 7                            | 0.70                | 9.94                | 5.8E-04             |
| mmu04514 | Cell adhesion molecules (CAMs)      | 169                      | 8                            | 1.37                | 5.85                | 4.5E-03             |
| mmu05230 | Central carbon metabolism in cancer | 66                       | 5                            | 0.53                | 9.36                | 1.1E-02             |
| mmu05144 | Malaria                             | 49                       | 4                            | 0.40                | 10.09               | 2.9E-02             |
| mmu04145 | Phagosome                           | 184                      | 7                            | 1.49                | 4.70                | 2.9E-02             |

**Supplementary Table 5:** Descriptions of the 12 genes significantly overexpressed in airway AMs compared to non-airway AMs in HN878-infected mice.

| Gene ID            | Gene short name | Gene Name                                           | Average expression level (FPKM) |            | Adjusted P value |
|--------------------|-----------------|-----------------------------------------------------|---------------------------------|------------|------------------|
|                    |                 |                                                     | Airway                          | Non-airway |                  |
| ENSMUSG00000028680 | Plk3            | Polo-like kinase 3                                  | 41.95                           | 24.46      | 3.0E-04          |
| ENSMUSG00000038508 | Gdf15           | Growth differentiation factor 15                    | 31.3                            | 14.4       | 3.3E-03          |
| ENSMUSG00000052512 | Nav2            | Neuron navigator 2                                  | 0.7                             | 0.3        | 4.5E-03          |
| ENSMUSG00000041268 | Dmxl2           | Dmx-like 2                                          | 6.3                             | 4.0        | 1.8E-02          |
| ENSMUSG00000033705 | Stard9          | START domain containing 9                           | 0.5                             | 0.3        | 1.8E-02          |
| ENSMUSG00000037279 | Ovol2           | Ovo like zinc finger 2                              | 5.0                             | 2.6        | 2.4E-02          |
| ENSMUSG00000020205 | Phlda1          | Pleckstrin homology like domain, family A, member 1 | 26.8                            | 14.3       | 2.5E-02          |
| ENSMUSG00000038352 | Arl5c           | ADP-ribosylation factor-like 5C                     | 73.4                            | 33.2       | 3.1E-02          |
| ENSMUSG00000042745 | Id1             | Inhibitor of DNA binding 1                          | 33.9                            | 18.9       | 3.5E-02          |
| ENSMUSG00000033004 | Mycbp2          | MYC binding protein 2                               | 3.2                             | 1.9        | 4.1E-02          |
| ENSMUSG00000056708 | Ier5            | Immediate early response 5                          | 32.3                            | 19.2       | 4.1E-02          |
| ENSMUSG00000025893 | Kbtbd3          | Kelch repeat and BTB (POZ) domain containing 3      | 6.3                             | 4.0        | 4.9E-02          |

**Supplementary Table 6:** KEGG pathways significantly enriched among the 3517 genes overexpressed in the infected airway AMs compared to uninfected airway AMs.

| KEGG ID  | # genes in pathway                          | # genes in test set | Expected # genes | Enrichment Ratio | Adjusted P value |          |
|----------|---------------------------------------------|---------------------|------------------|------------------|------------------|----------|
| mmu03050 | Proteasome                                  | 45                  | 39.00            | 7.65             | 5.10             | 0        |
| mmu05168 | Herpes simplex infection                    | 215                 | 79.00            | 36.57            | 2.16             | 2.25E-10 |
| mmu04612 | Antigen processing and presentation         | 91                  | 44.00            | 15.48            | 2.84             | 3.78E-10 |
| mmu03040 | Spliceosome                                 | 133                 | 54.00            | 22.62            | 2.39             | 5.52E-09 |
| mmu01100 | Metabolic pathways                          | 1309                | 301.00           | 222.62           | 1.35             | 3.4E-08  |
| mmu04142 | Lysosome                                    | 124                 | 47.00            | 21.09            | 2.23             | 8.77E-07 |
| mmu05012 | Parkinson's disease                         | 144                 | 52.00            | 24.49            | 2.12             | 8.99E-07 |
| mmu04145 | Phagosome                                   | 184                 | 60.00            | 31.29            | 1.92             | 4.83E-06 |
| mmu00520 | Amino sugar and nucleotide sugar metabolism | 49                  | 24.00            | 8.33             | 2.88             | 7.65E-06 |
| mmu00190 | Oxidative phosphorylation                   | 134                 | 47.00            | 22.79            | 2.06             | 8.15E-06 |
| mmu04141 | Protein processing in endoplasmic reticulum | 167                 | 55.00            | 28.40            | 1.94             | 8.15E-06 |
| mmu05169 | Epstein-Barr virus infection                | 221                 | 67.00            | 37.59            | 1.78             | 1.32E-05 |
| mmu05150 | Staphylococcus aureus infection             | 52                  | 24.00            | 8.84             | 2.71             | 2.12E-05 |
| mmu04621 | NOD-like receptor signaling pathway         | 169                 | 54.00            | 28.74            | 1.88             | 2.41E-05 |
| mmu04932 | Non-alcoholic fatty liver disease (NAFLD)   | 153                 | 50.00            | 26.02            | 1.92             | 2.67E-05 |
| mmu05332 | Graft-versus-host disease                   | 65                  | 27.00            | 11.05            | 2.44             | 4.7E-05  |
| mmu05140 | Leishmaniasis                               | 66                  | 27.00            | 11.22            | 2.41             | 6.28E-05 |
| mmu03013 | RNA transport                               | 167                 | 52.00            | 28.40            | 1.83             | 6.97E-05 |
| mmu04130 | SNARE interactions in vesicular transport   | 33                  | 17.00            | 5.61             | 3.03             | 8.91E-05 |
| mmu05152 | Tuberculosis                                | 178                 | 54.00            | 30.27            | 1.78             | 9.61E-05 |
| mmu05323 | Rheumatoid arthritis                        | 83                  | 31.00            | 14.12            | 2.20             | 9.61E-05 |
| mmu05016 | Huntington's disease                        | 194                 | 57.00            | 32.99            | 1.73             | 0.000146 |
| mmu05166 | HTLV-I infection                            | 285                 | 76.00            | 48.47            | 1.57             | 0.000258 |
| mmu05330 | Allograft rejection                         | 64                  | 25.00            | 10.88            | 2.30             | 0.000265 |
| mmu05164 | Influenza A                                 | 170                 | 50.00            | 28.91            | 1.73             | 0.00043  |
| mmu04940 | Type I diabetes mellitus                    | 70                  | 26.00            | 11.90            | 2.18             | 0.000473 |
| mmu04380 | Osteoclast differentiation                  | 132                 | 41.00            | 22.45            | 1.83             | 0.000505 |
| mmu00240 | Pyrimidine metabolism                       | 104                 | 34.00            | 17.69            | 1.92             | 0.000679 |
| mmu00100 | Steroid biosynthesis                        | 19                  | 11.00            | 3.23             | 3.40             | 0.000679 |
| mmu05416 | Viral myocarditis                           | 88                  | 30.00            | 14.97            | 2.00             | 0.000714 |

|          |                                            |     |       |       |      |          |
|----------|--------------------------------------------|-----|-------|-------|------|----------|
| mmu04144 | Endocytosis                                | 286 | 74.00 | 48.64 | 1.52 | 0.000727 |
| mmu01200 | Carbon metabolism                          | 118 | 37.00 | 20.07 | 1.84 | 0.000791 |
| mmu04650 | Natural killer cell mediated cytotoxicity  | 120 | 37.00 | 20.41 | 1.81 | 0.001135 |
| mmu05133 | Pertussis                                  | 75  | 26.00 | 12.76 | 2.04 | 0.001377 |
| mmu05010 | Alzheimer's disease                        | 175 | 49.00 | 29.76 | 1.65 | 0.001418 |
| mmu00620 | Pyruvate metabolism                        | 38  | 16.00 | 6.46  | 2.48 | 0.001938 |
| mmu03030 | DNA replication                            | 35  | 15.00 | 5.95  | 2.52 | 0.002326 |
| mmu04210 | Apoptosis                                  | 138 | 40.00 | 23.47 | 1.70 | 0.002326 |
| mmu00020 | Citrate cycle (TCA cycle)                  | 32  | 14.00 | 5.44  | 2.57 | 0.002716 |
| mmu04668 | TNF signaling pathway                      | 109 | 33.00 | 18.54 | 1.78 | 0.003092 |
| mmu03420 | Nucleotide excision repair                 | 44  | 17.00 | 7.48  | 2.27 | 0.003716 |
| mmu04659 | Th17 cell differentiation                  | 102 | 31.00 | 17.35 | 1.79 | 0.004046 |
| mmu04120 | Ubiquitin mediated proteolysis             | 140 | 39.00 | 23.81 | 1.64 | 0.005705 |
| mmu05145 | Toxoplasmosis                              | 113 | 33.00 | 19.22 | 1.72 | 0.005705 |
| mmu00230 | Purine metabolism                          | 178 | 47.00 | 30.27 | 1.55 | 0.006205 |
| mmu05340 | Primary immunodeficiency                   | 36  | 14.00 | 6.12  | 2.29 | 0.009472 |
| mmu05160 | Hepatitis C                                | 136 | 37.00 | 23.13 | 1.60 | 0.011282 |
| mmu04658 | Th1 and Th2 cell differentiation           | 87  | 26.00 | 14.80 | 1.76 | 0.012486 |
| mmu04660 | T cell receptor signaling pathway          | 105 | 30.00 | 17.86 | 1.68 | 0.012612 |
| mmu00010 | Glycolysis / Gluconeogenesis               | 66  | 21.00 | 11.22 | 1.87 | 0.013246 |
| mmu03008 | Ribosome biogenesis in eukaryotes          | 79  | 24.00 | 13.44 | 1.79 | 0.013246 |
| mmu05320 | Autoimmune thyroid disease                 | 79  | 24.00 | 13.44 | 1.79 | 0.013246 |
| mmu03060 | Protein export                             | 30  | 12.00 | 5.10  | 2.35 | 0.013419 |
| mmu05134 | Legionellosis                              | 58  | 19.00 | 9.86  | 1.93 | 0.013749 |
| mmu03018 | RNA degradation                            | 81  | 24.00 | 13.78 | 1.74 | 0.018042 |
| mmu04640 | Hematopoietic cell lineage                 | 95  | 27.00 | 16.16 | 1.67 | 0.01953  |
| mmu00280 | Valine, leucine and isoleucine degradation | 56  | 18.00 | 9.52  | 1.89 | 0.021088 |
| mmu05162 | Measles                                    | 138 | 36.00 | 23.47 | 1.53 | 0.022493 |
| mmu00052 | Galactose metabolism                       | 32  | 12.00 | 5.44  | 2.20 | 0.022615 |
| mmu04620 | Toll-like receptor signaling pathway       | 101 | 28.00 | 17.18 | 1.63 | 0.022812 |
| mmu00072 | Synthesis and degradation of ketone bodies | 11  | 6.00  | 1.87  | 3.21 | 0.024919 |
| mmu05142 | Chagas disease (American trypanosomiasis)  | 103 | 28.00 | 17.52 | 1.60 | 0.029623 |
| mmu05203 | Viral carcinogenesis                       | 235 | 55.00 | 39.97 | 1.38 | 0.031497 |
| mmu03430 | Mismatch repair                            | 22  | 9.00  | 3.74  | 2.41 | 0.03246  |
| mmu04622 | RIG-I-like receptor signaling pathway      | 68  | 20.00 | 11.56 | 1.73 | 0.035221 |
| mmu04623 | Cytosolic DNA-sensing pathway              | 64  | 19.00 | 10.88 | 1.75 | 0.037481 |
| mmu01230 | Biosynthesis of amino acids                | 78  | 22.00 | 13.27 | 1.66 | 0.039805 |
| mmu05132 | Salmonella infection                       | 78  | 22.00 | 13.27 | 1.66 | 0.039805 |

|          |                                              |     |       |       |      |          |
|----------|----------------------------------------------|-----|-------|-------|------|----------|
| mmu04672 | Intestinal immune network for IgA production | 43  | 14.00 | 7.31  | 1.91 | 0.0406   |
| mmu00900 | Terpenoid backbone biosynthesis              | 23  | 9.00  | 3.91  | 2.30 | 0.041531 |
| mmu00640 | Propanoate metabolism                        | 31  | 11.00 | 5.27  | 2.09 | 0.043027 |
| mmu03022 | Basal transcription factors                  | 44  | 14.00 | 7.48  | 1.87 | 0.047977 |
| mmu04062 | Chemokine signaling pathway                  | 196 | 46.00 | 33.33 | 1.38 | 0.047977 |

**Supplementary Table 7:** KEGG pathways significantly enriched among the 4442 genes overexpressed in the uninfected airway AMs compared to infected airway AMs.

| KEGG ID  | # genes in pathway                                   | # genes in test set | Expected # genes | Enrichment Ratio | Adjusted P value |          |
|----------|------------------------------------------------------|---------------------|------------------|------------------|------------------|----------|
| mmu03010 | Ribosome                                             | 141                 | 73.00            | 29.0             | 2.5              | 3.32E-14 |
| mmu04510 | Focal adhesion                                       | 203                 | 84.00            | 41.70            | 2.01             | 9.44E-10 |
| mmu04810 | Regulation of actin cytoskeleton                     | 218                 | 85.00            | 44.78            | 1.90             | 1.89E-08 |
| mmu05206 | MicroRNAs in cancer                                  | 141                 | 61.00            | 28.96            | 2.11             | 4.65E-08 |
| mmu04360 | Axon guidance                                        | 177                 | 70.00            | 36.35            | 1.93             | 2.31E-07 |
| mmu04022 | cGMP-PKG signaling pathway                           | 173                 | 67.00            | 35.53            | 1.89             | 1.12E-06 |
| mmu05200 | Pathways in cancer                                   | 395                 | 125.00           | 81.13            | 1.54             | 2.79E-06 |
| mmu04910 | Insulin signaling pathway                            | 143                 | 57.00            | 29.37            | 1.94             | 2.95E-06 |
| mmu04919 | Thyroid hormone signaling pathway                    | 117                 | 49.00            | 24.03            | 2.04             | 3.51E-06 |
| mmu04512 | ECM-receptor interaction                             | 83                  | 38.00            | 17.05            | 2.23             | 5.45E-06 |
| mmu04320 | Dorso-ventral axis formation                         | 26                  | 17.00            | 5.34             | 3.18             | 2.24E-05 |
| mmu04072 | Phospholipase D signaling pathway                    | 145                 | 55.00            | 29.78            | 1.85             | 2.24E-05 |
| mmu04931 | Insulin resistance                                   | 111                 | 45.00            | 22.80            | 1.97             | 2.41E-05 |
| mmu04211 | Longevity regulating pathway                         | 95                  | 39.00            | 19.51            | 2.00             | 8.06E-05 |
| mmu04915 | Estrogen signaling pathway                           | 98                  | 39.00            | 20.13            | 1.94             | 0.000184 |
| mmu04010 | MAPK signaling pathway                               | 252                 | 80.00            | 51.76            | 1.55             | 0.000265 |
| mmu05220 | Chronic myeloid leukemia                             | 73                  | 31.00            | 14.99            | 2.07             | 0.000289 |
| mmu04530 | Tight junction                                       | 140                 | 50.00            | 28.76            | 1.74             | 0.000328 |
| mmu04520 | Adherens junction                                    | 74                  | 31.00            | 15.20            | 2.04             | 0.000358 |
| mmu01522 | Endocrine resistance                                 | 95                  | 37.00            | 19.51            | 1.90             | 0.000409 |
| mmu05224 | Breast cancer                                        | 146                 | 51.00            | 29.99            | 1.70             | 0.000464 |
| mmu05231 | Choline metabolism in cancer                         | 101                 | 38.00            | 20.74            | 1.83             | 0.000662 |
| mmu04012 | ErbB signaling pathway                               | 87                  | 34.00            | 17.87            | 1.90             | 0.000662 |
| mmu04664 | Fc epsilon RI signaling pathway                      | 70                  | 29.00            | 14.38            | 2.02             | 0.000662 |
| mmu04024 | cAMP signaling pathway                               | 199                 | 64.00            | 40.87            | 1.57             | 0.000773 |
| mmu04933 | AGE-RAGE signaling pathway in diabetic complications | 102                 | 38.00            | 20.95            | 1.81             | 0.000773 |
| mmu04310 | Wnt signaling pathway                                | 146                 | 50.00            | 29.99            | 1.67             | 0.000773 |
| mmu05215 | Prostate cancer                                      | 89                  | 34.00            | 18.28            | 1.86             | 0.000964 |
| mmu04152 | AMPK signaling pathway                               | 129                 | 45.00            | 26.50            | 1.70             | 0.000964 |

|          |                                                 |     |       |       |      |          |
|----------|-------------------------------------------------|-----|-------|-------|------|----------|
| mmu04270 | Vascular smooth muscle contraction              | 129 | 45.00 | 26.50 | 1.70 | 0.000964 |
| mmu04330 | Notch signaling pathway                         | 49  | 22.00 | 10.06 | 2.19 | 0.000976 |
| mmu00310 | Lysine degradation                              | 59  | 25.00 | 12.12 | 2.06 | 0.001038 |
| mmu04722 | Neurotrophin signaling pathway                  | 123 | 43.00 | 25.26 | 1.70 | 0.001147 |
| mmu04015 | Rap1 signaling pathway                          | 215 | 67.00 | 44.16 | 1.52 | 0.001147 |
| mmu04070 | Phosphatidylinositol signaling system           | 98  | 36.00 | 20.13 | 1.79 | 0.001229 |
| mmu00562 | Inositol phosphate metabolism                   | 70  | 28.00 | 14.38 | 1.95 | 0.001229 |
| mmu04392 | Hippo signaling pathway -multiple species       | 26  | 14.00 | 5.34  | 2.62 | 0.00143  |
| mmu05222 | Small cell lung cancer                          | 85  | 32.00 | 17.46 | 1.83 | 0.001535 |
| mmu05100 | Bacterial invasion of epithelial cells          | 78  | 30.00 | 16.02 | 1.87 | 0.001535 |
| mmu01521 | EGFR tyrosine kinase inhibitor resistance       | 82  | 31.00 | 16.84 | 1.84 | 0.001699 |
| mmu05205 | Proteoglycans in cancer                         | 204 | 63.00 | 41.90 | 1.50 | 0.001978 |
| mmu04611 | Platelet activation                             | 123 | 42.00 | 25.26 | 1.66 | 0.001979 |
| mmu04390 | Hippo signaling pathway                         | 154 | 50.00 | 31.63 | 1.58 | 0.002158 |
| mmu04921 | Oxytocin signaling pathway                      | 159 | 51.00 | 32.66 | 1.56 | 0.00256  |
| mmu04068 | FoxO signaling pathway                          | 134 | 44.00 | 27.52 | 1.60 | 0.003529 |
| mmu04925 | Aldosterone synthesis and secretion             | 86  | 31.00 | 17.66 | 1.75 | 0.003894 |
| mmu04014 | Ras signaling pathway                           | 230 | 68.00 | 47.24 | 1.44 | 0.003978 |
| mmu05213 | Endometrial cancer                              | 52  | 21.00 | 10.68 | 1.97 | 0.005166 |
| mmu04144 | Endocytosis                                     | 286 | 81.00 | 58.74 | 1.38 | 0.005166 |
| mmu05214 | Glioma                                          | 66  | 25.00 | 13.56 | 1.84 | 0.005166 |
| mmu04666 | Fc gamma R-mediated phagocytosis                | 89  | 31.00 | 18.28 | 1.70 | 0.006536 |
| mmu04912 | GnRH signaling pathway                          | 89  | 31.00 | 18.28 | 1.70 | 0.006536 |
| mmu04914 | Progesterone-mediated oocyte maturation         | 89  | 31.00 | 18.28 | 1.70 | 0.006536 |
| mmu05221 | Acute myeloid leukemia                          | 57  | 22.00 | 11.71 | 1.88 | 0.007193 |
| mmu04540 | Gap junction                                    | 86  | 30.00 | 17.66 | 1.70 | 0.007289 |
| mmu04151 | PI3K-Akt signaling pathway                      | 345 | 94.00 | 70.86 | 1.33 | 0.007289 |
| mmu04922 | Glucagon signaling pathway                      | 102 | 34.00 | 20.95 | 1.62 | 0.008599 |
| mmu05202 | Transcriptional misregulation in cancer         | 177 | 53.00 | 36.35 | 1.46 | 0.009026 |
| mmu05212 | Pancreatic cancer                               | 66  | 24.00 | 13.56 | 1.77 | 0.010585 |
| mmu05414 | Dilated cardiomyopathy                          | 89  | 30.00 | 18.28 | 1.64 | 0.012321 |
| mmu04720 | Long-term potentiation                          | 67  | 24.00 | 13.76 | 1.74 | 0.012905 |
| mmu04974 | Protein digestion and absorption                | 90  | 30.00 | 18.49 | 1.62 | 0.014263 |
| mmu04213 | Longevity regulating pathway - multiple species | 64  | 23.00 | 13.15 | 1.75 | 0.014263 |
| mmu05210 | Colorectal cancer                               | 64  | 23.00 | 13.15 | 1.75 | 0.014263 |
| mmu04930 | Type II diabetes mellitus                       | 50  | 19.00 | 10.27 | 1.85 | 0.015371 |
| mmu04724 | Glutamatergic synapse                           | 114 | 36.00 | 23.42 | 1.54 | 0.01573  |
| mmu04725 | Cholinergic synapse                             | 112 | 35.00 | 23.00 | 1.52 | 0.021113 |

|          |                                                        |     |       |       |      |          |
|----------|--------------------------------------------------------|-----|-------|-------|------|----------|
| mmu04071 | Sphingolipid signaling pathway                         | 124 | 38.00 | 25.47 | 1.49 | 0.021204 |
| mmu04917 | Prolactin signaling pathway                            | 74  | 25.00 | 15.20 | 1.64 | 0.022886 |
| mmu05223 | Non-small cell lung cancer                             | 56  | 20.00 | 11.50 | 1.74 | 0.025659 |
| mmu02010 | ABC transporters                                       | 46  | 17.00 | 9.45  | 1.80 | 0.031272 |
| mmu05161 | Hepatitis B                                            | 145 | 42.00 | 29.78 | 1.41 | 0.038827 |
| mmu03460 | Fanconi anemia pathway                                 | 51  | 18.00 | 10.48 | 1.72 | 0.041793 |
| mmu04662 | B cell receptor signaling pathway                      | 74  | 24.00 | 15.20 | 1.58 | 0.042552 |
| mmu04971 | Gastric acid secretion                                 | 74  | 24.00 | 15.20 | 1.58 | 0.042552 |
| mmu05412 | Arrhythmogenic right ventricular cardiomyopathy (ARVC) | 74  | 24.00 | 15.20 | 1.58 | 0.042552 |
| mmu05146 | Amoebiasis                                             | 110 | 33.00 | 22.59 | 1.46 | 0.044953 |
| mmu05211 | Renal cell carcinoma                                   | 67  | 22.00 | 13.76 | 1.60 | 0.047118 |
| mmu04750 | Inflammatory mediator regulation of TRP channels       | 127 | 37.00 | 26.09 | 1.42 | 0.048553 |
| mmu04150 | mTOR signaling pathway                                 | 156 | 44.00 | 32.04 | 1.37 | 0.048581 |
